# Supplementary material for: Enzymatic processing of mussel shells to produce biorenewable calcium carbonate in seawater
Source: Royal Society of Chemistry journal article supplement (doi:10.1039/c8gc01274a), 2018-01-01
Supplement: c8gc01274a1.pdf [file c8gc01274a1.pdf]

## Supplementary Information

### Enzymatic processing of mussel shells to produce biorenewable calcium carbonate in seawater

Jennifer N. Murphy,<sup>a</sup> Kelly Hawboldt<sup>\*b</sup> and Francesca M. Kerton<sup>\*a</sup>

a) Department of Chemistry, Memorial University of Newfoundland, St. John's, NL, A1B 3X7, Canada

b) Department of Process Engineering, Memorial University of Newfoundland, St. John's, NL, A1B 3X7, Canada

fkerton@mun.ca

#### Contents

|                                                                                                                                                                                                                                                        |            |
|--------------------------------------------------------------------------------------------------------------------------------------------------------------------------------------------------------------------------------------------------------|------------|
| <b>1. Table S1:</b> Experimental data for $2^4$ factorial design with center points using Multifect 6L to clean raw, shell-on mussels.                                                                                                                 | <b>S2</b>  |
| <b>2. Table S2 and Design Summary:</b> Analysis of variance and partial sum of squares for the $2^4$ factorial design using Multifect 6L to clean raw, shell on mussels.                                                                               | <b>S4</b>  |
| <b>3. Figure S1:</b> Normal Plot of residuals for the model developed from the $2^4$ factorial design used to optimize the use of Multifect 6L to clean raw, shell on mussel.                                                                          | <b>S5</b>  |
| <b>4. Figure S2:</b> Residuals vs. run for the model developed from the $2^4$ factorial design used to optimize the use of Multifect 6L to clean raw, shell on mussel.                                                                                 | <b>S5</b>  |
| <b>5. Figure S3:</b> Residuals vs. predicted for the model developed from the $2^4$ factorial design used to optimize the use of Multifect 6L to clean raw, shell on mussel.                                                                           | <b>S6</b>  |
| <b>6. Figure S4:</b> One factor plots for the $2^4$ factorial design for the optimization of reaction conditions with respect to temperature, amount of enzyme solution, time and medium for the cleaning of raw, shell on mussels using Multifect 6L. | <b>S6</b>  |
| <b>7. Table S3:</b> Experimental data for the I-optimal custom design (a response surface method) with 4 replicate points and 8 center points using Multifect 7L to clean cooked, shell-on mussels.                                                    | <b>S7</b>  |
| <b>8. Table S4 and Design Summary:</b> Analysis of variance and partial sum of squares for the I-optimal custom design using Multifect 7L to clean cooked, shell on mussels.                                                                           | <b>S8</b>  |
| <b>9. Figure S5:</b> Normal Plot of residuals for the model developed from the I-optimal design used to optimize the use of Multifect 7L to clean cooked, shell on mussel.                                                                             | <b>S9</b>  |
| <b>10. Figure S6:</b> Residuals vs. run for the model developed from the I-optimal design used to optimize the use of Multifect 7L to clean cooked, shell on mussel.                                                                                   | <b>S9</b>  |
| <b>11. Figure S7:</b> Residuals vs. predicted for the model developed from the I-optimal design used to optimize the use of Multifect 7L to clean cooked, shell on mussel.                                                                             | <b>S10</b> |
| <b>12. Figure S8:</b> One factor plots for the I-optimal design for the optimization of reaction conditions with respect to time, amount of enzyme solution, and medium for the cleaning of cooked, shell on mussels using Multifect 7L.               | <b>S10</b> |

**Table S5:** Experimental data for 2<sup>4</sup> factorial design with center points using Multifect 6L to clean raw, shell-on mussels. Optimization of temperature, time, amount of enzyme solution, and reaction medium to yield the minimum meat residue.

| <b>Run</b> | <b>Temperature<br/>(°C)</b> | <b>Enzyme Loading<br/>(μL/g)</b> | <b>Time<br/>(h)</b> | <b>Medium<sup>a</sup></b> | <b>Wt% Meat<br/>Remaining</b> |
|------------|-----------------------------|----------------------------------|---------------------|---------------------------|-------------------------------|
|            | <b>(X1)</b>                 | <b>(X2)</b>                      | <b>(X3)</b>         | <b>(X4)</b>               | <b>(Response)</b>             |
| 1          | 35.0                        | 1.0                              | 4                   | NS                        | 2.3                           |
| 2          | 55.0                        | 2.0                              | 4                   | NS                        | 0                             |
| 3          | 35.0                        | 2.0                              | 2                   | NS                        | 5.3                           |
| 4          | 35.0                        | 2.0                              | 2                   | TW                        | 12.6                          |
| 5          | 55.0                        | 2.0                              | 4                   | NS                        | 0                             |
| 6          | 35.0                        | 1.0                              | 2                   | TW                        | 8.4                           |
| 7          | 35.0                        | 1.0                              | 2                   | TW                        | 6.4                           |
| 8          | 35.0                        | 2.0                              | 4                   | NS                        | 6.4                           |
| 9          | 55.0                        | 1.0                              | 4                   | TW                        | 0.15                          |
| 10         | 35.0                        | 2.0                              | 2                   | NS                        | 9.1                           |
| 11         | 35.0                        | 2.0                              | 4                   | TW                        | 2.5                           |
| 12         | 55.0                        | 1.0                              | 2                   | TW                        | 0.91                          |
| 13         | 35.0                        | 2.0                              | 2                   | TW                        | 1.3                           |
| 14         | 35.0                        | 1.0                              | 4                   | TW                        | 2.7                           |
| 15         | 55.0                        | 2.0                              | 2                   | NS                        | 0.13                          |
| 16         | 35.0                        | 1.0                              | 4                   | NS                        | 0.93                          |
| 17         | 35.0                        | 2.0                              | 2                   | NS                        | 3.1                           |
| 18         | 35.0                        | 2.0                              | 4                   | TW                        | 1.4                           |
| 19         | 55.0                        | 2.0                              | 2                   | TW                        | 0                             |
| 20         | 55.0                        | 2.0                              | 4                   | TW                        | 0                             |
| 21         | 45.0                        | 1.5                              | 3                   | NS                        | 3.1                           |
| 22         | 55.0                        | 2.0                              | 2                   | TW                        | 0.21                          |
| 23         | 35.0                        | 1.0                              | 4                   | NS                        | 5.1                           |
| 24         | 55.0                        | 2.0                              | 2                   | NS                        | 0.8                           |
| 25         | 55.0                        | 1.0                              | 2                   | TW                        | 0.82                          |
| 26         | 35.0                        | 1.0                              | 2                   | TW                        | 1.2                           |
| 27         | 55.0                        | 1.0                              | 4                   | TW                        | 0.71                          |
| 28         | 35.0                        | 2.0                              | 2                   | TW                        | 0.91                          |
| 29         | 35.0                        | 1.0                              | 2                   | NS                        | 5.1                           |
| 30         | 35.0                        | 1.0                              | 2                   | NS                        | 8.1                           |
| 31         | 55.0                        | 1.0                              | 2                   | TW                        | 1.9                           |
| 32         | 55.0                        | 1.0                              | 2                   | NS                        | 0.52                          |
| 33         | 55.0                        | 2.0                              | 4                   | NS                        | 0.44                          |
| 34         | 35.0                        | 1.0                              | 4                   | TW                        | 6.4                           |
| 35         | 55.0                        | 1.0                              | 4                   | NS                        | 0.32                          |
| 36         | 55.0                        | 1.0                              | 4                   | TW                        | 0                             |

|    |      |     |   |    |      |
|----|------|-----|---|----|------|
| 37 | 55.0 | 2.0 | 4 | TW | 0.08 |
| 38 | 55.0 | 1.0 | 4 | NS | 0.52 |
| 39 | 55.0 | 1.0 | 4 | NS | 0    |
| 40 | 35.0 | 2.0 | 4 | NS | 0.94 |
| 41 | 55.0 | 1.0 | 2 | NS | 1.2  |
| 42 | 45.0 | 1.5 | 3 | TW | 2.1  |
| 43 | 35.0 | 1.0 | 2 | NS | 6.8  |
| 44 | 45.0 | 1.5 | 3 | TW | 3.4  |
| 45 | 35.0 | 2.0 | 4 | TW | 3.8  |
| 46 | 55.0 | 2.0 | 2 | NS | 0.92 |
| 47 | 35.0 | 2.0 | 4 | NS | 3.7  |
| 48 | 55.0 | 2.0 | 4 | TW | 0.11 |
| 49 | 35.0 | 1.0 | 4 | TW | 3.2  |
| 50 | 55.0 | 1.0 | 2 | NS | 1.8  |
| 51 | 45.0 | 1.5 | 3 | NS | 2.5  |
| 52 | 55.0 | 2.0 | 2 | TW | 0.62 |

---

<sup>a</sup>NS=natural seawater and TW=tap water

**Table S6 and Design Summary:** Analysis of variance and partial sum of squares for the 2<sup>4</sup> factorial design using Multifect 6L to clean raw, shell on mussels.

| Source         | Sum of Squares | df | Mean Square | F Value | p-value Prob > F |                 |
|----------------|----------------|----|-------------|---------|------------------|-----------------|
| Model          | 26.07          | 2  | 13.04       | 46.11   | 5.47 E-12        | significant     |
| X1-Temperature | 23.21          | 1  | 23.21       | 82.09   | 4.80 E-12        |                 |
| X3-Time        | 2.86           | 1  | 2.86        | 10.12   | 0.0026           |                 |
| Residual       | 13.86          | 49 | 0.28        |         |                  |                 |
| Lack of Fit    | 2.51           | 15 | 0.17        | 0.50    | 0.9233           | not significant |
| Pure Error     | 11.35          | 34 | 0.33        |         |                  |                 |
| Cor Total      | 39.93          | 51 |             |         |                  |                 |

|                          |       |                       |        |
|--------------------------|-------|-----------------------|--------|
| <b>Std. Dev.</b>         | 0.53  | <b>R-Squared</b>      | 0.6530 |
| <b>Mean</b>              | 1.33  | <b>Adj R-Squared</b>  | 0.6388 |
| <b>C.V. %</b>            | 40.05 | <b>Pred R-Squared</b> | 0.6078 |
| <b>PRESS</b>             | 15.66 | <b>Adeq Precision</b> | 14.713 |
| <b>-2 Log Likelihood</b> | 78.80 | <b>BIC</b>            | 90.650 |
| <b>AICc</b>              | 85.30 |                       |        |

The model has a square root transform with a constant, k=0.0126.

Final equation in terms of coded factors for the use of Multifect 6L to clean raw, shell on mussels:

$$\text{Sqrt (wt. \% meat remaining + 0.01)} = 1.33 - 0.69(X1) - 0.24(X3)$$

Residual Diagnostics for the model resulting from the 2<sup>4</sup> factorial design with center points using Multifect 6L to clean raw, shell-on mussels are shown in Figures S1-S3.

The analysis of variance (ANOVA) gave two significant effects, temperature (X1) and time (X3), for the 2<sup>4</sup> factorial design for the optimization of cleaning raw, shell on mussels with Multifect 6L. As shown in Figure S12, when temperature and time are increased, the less residual meat that remains. Ultimately meaning, at higher temperature and longer reaction times, we get cleaner mussel shells.

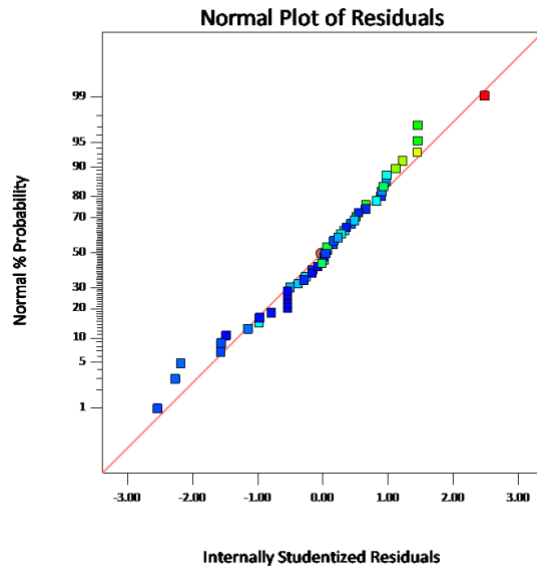

**Figure S9:** Normal Plot of residuals for the model developed from the  $2^4$  factorial design used to optimize the use of Multifect 6L to clean raw, shell on mussel.

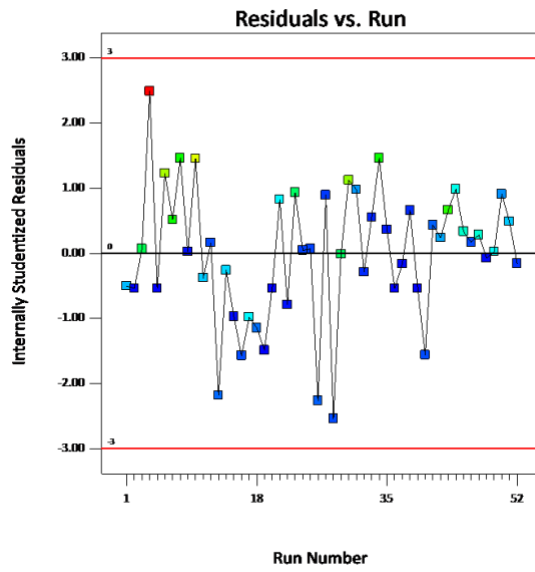

**Figure S10:** Residuals vs. run for the model developed from the  $2^4$  factorial design used to optimize the use of Multifect 6L to clean raw, shell on mussel.

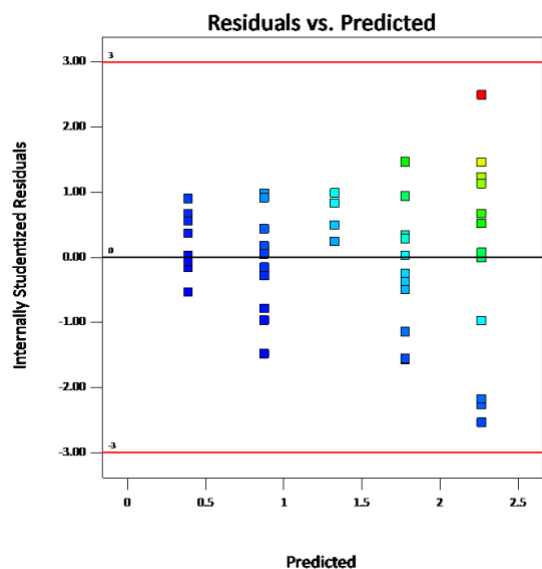

**Figure S11:** Residuals vs. predicted for the model developed from the  $2^4$  factorial design used to optimize the use of Multifect 6L to clean raw, shell on mussel.

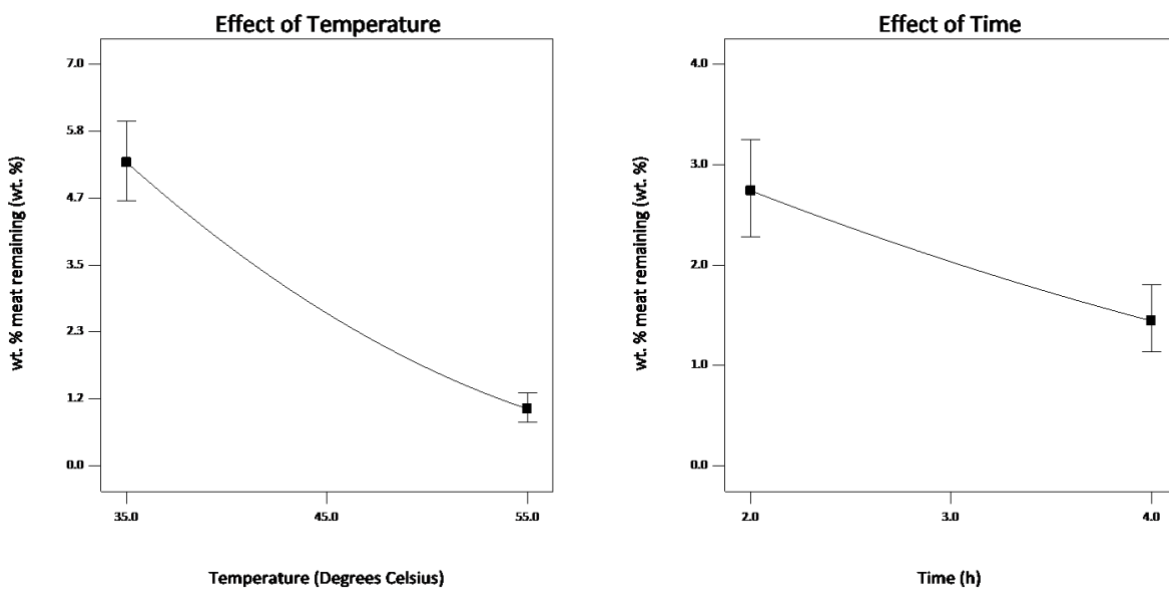

**Figure S12:** One factor plots for the  $2^4$  factorial design for the optimization of reaction conditions with respect to temperature, amount of enzyme solution, time and medium for the cleaning of raw, shell on mussels using Multifect 6L. The effect of temperature (X1), left and the effect of time (X3), right.

**Table S7:** Experimental data for the I-optimal custom design (a response surface method) with 4 replicate points and 8 center points using Multifect 7L to clean cooked, shell-on mussels. Optimization of time, amount of enzyme solution, and reaction medium to yield the minimum meat residue.<sup>a</sup>

| <b>Run</b> | <b>Enzyme Loading (<math>\mu\text{L/g}</math>)<br/>(Z1)</b> | <b>Time (h)<br/>(Z2)</b> | <b>Medium<sup>b</sup><br/>(Z3)</b> | <b>Wt% Meat Remaining<br/>(Response)</b> |
|------------|-------------------------------------------------------------|--------------------------|------------------------------------|------------------------------------------|
| 1          | 3.0                                                         | 2                        | NS                                 | 1.5                                      |
| 2          | 4.5                                                         | 6                        | NS                                 | 0.28                                     |
| 3          | 4.5                                                         | 6                        | SS                                 | 0.25                                     |
| 4          | 6.0                                                         | 2                        | NS                                 | 1.1                                      |
| 5          | 4.5                                                         | 6                        | NS                                 | 0.2                                      |
| 6          | 6.0                                                         | 10                       | NS                                 | 0                                        |
| 7          | 6.0                                                         | 10                       | SS                                 | 0                                        |
| 8          | 4.5                                                         | 6                        | SS                                 | 0.23                                     |
| 9          | 4.5                                                         | 6                        | NS                                 | 0.2                                      |
| 10         | 3.0                                                         | 2                        | SS                                 | 1.7                                      |
| 11         | 3.0                                                         | 10                       | NS                                 | 0.12                                     |
| 12         | 3.0                                                         | 10                       | NS                                 | 0.86                                     |
| 13         | 4.5                                                         | 6                        | SS                                 | 0.24                                     |
| 14         | 3.0                                                         | 2                        | NS                                 | 1.7                                      |
| 15         | 3.0                                                         | 10                       | SS                                 | 0.13                                     |
| 16         | 4.5                                                         | 6                        | NS                                 | 0.23                                     |
| 17         | 6.0                                                         | 10                       | NS                                 | 0.09                                     |
| 18         | 6.0                                                         | 2                        | NS                                 | 0.62                                     |
| 19         | 4.5                                                         | 6                        | SS                                 | 0.17                                     |
| 20         | 3.0                                                         | 2                        | SS                                 | 0.48                                     |
| 21         | 6.0                                                         | 2                        | SS                                 | 0.58                                     |
| 22         | 6.0                                                         | 2                        | SS                                 | 2.28                                     |
| 23         | 3.0                                                         | 10                       | SS                                 | 0.95                                     |
| 24         | 6.0                                                         | 10                       | SS                                 | 0.22                                     |

- a. All reactions performed at room temperature; b. NS = natural seawater (salinity, 25 ppt) and SS = synthetic seawater (salinity, 35 ppt)

**Table S8 and Design Summary:** Analysis of variance and partial sum of squares for the I-optimal custom design using Multifect 7L to clean cooked, shell on mussels.

| Source            | Sum of Squares | df | Mean Square | F Value | p-value Prob > F |                 |
|-------------------|----------------|----|-------------|---------|------------------|-----------------|
| Model             | 24.09          | 2  | 12.05       | 14.64   | 0.0001           | significant     |
| Z1-Enzyme Loading | 5.25           | 1  | 5.25        | 6.38    | 0.0196           |                 |
| Z2-Time           | 18.84          | 1  | 18.84       | 22.90   | < 0.0001         |                 |
| Residual          | 17.28          | 21 | 0.82        |         |                  |                 |
| Lack of Fit       | 5.22           | 7  | 0.75        | 0.87    | 0.5548           | not significant |
| Pure Error        | 12.06          | 14 | 0.86        |         |                  |                 |
| Cor Total         | 41.38          | 23 |             |         |                  |                 |

|                          |       |                       |        |
|--------------------------|-------|-----------------------|--------|
| <b>Std. Dev.</b>         | 0.91  | <b>R-Squared</b>      | 0.5823 |
| <b>Mean</b>              | -1.14 | <b>Adj R-Squared</b>  | 0.5426 |
| <b>C.V. %</b>            | 79.28 | <b>Pred R-Squared</b> | 0.4061 |
| <b>PRESS</b>             | 24.57 | <b>Adeq Precision</b> | 10.340 |
| <b>-2 Log Likelihood</b> | 60.23 | <b>BIC</b>            | 69.76  |
| <b>AICc</b>              | 67.43 |                       |        |

The model has a natural log transform with a constant,  $k=0.0126$ .

Final equation in terms of coded factors for the use of Multifect 7L to clean cooked, shell on mussels:

$$\ln(\text{wt. \% meat remaining} + 0.01) = -1.14 - 0.57(Z1) - 1.09(Z2)$$

Residual Diagnostics for the model resulting from the I-optimal design with center points using Multifect 7L to clean cooked, shell-on mussels are shown in Figures S5-S6.

The analysis of variance (ANOVA) gave two significant effects, time (Z1) and amount of enzyme solution (Z2), for the I-optimal design for the optimization of cleaning cooked, shell on mussels with Multifect 7L. As shown in Figure S16, when time and amount of enzyme solution are increased, the less residual meat that remains. Ultimately meaning, the longer reaction times and the higher the enzyme solution loading, the cleaner mussel shells.



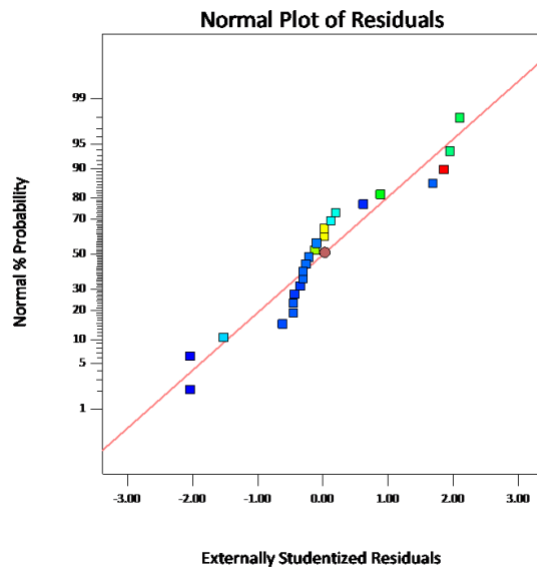

**Figure S13:** Normal Plot of residuals for the model developed from the I-optimal design used to optimize the use of Multifect 7L to clean cooked, shell on mussel.

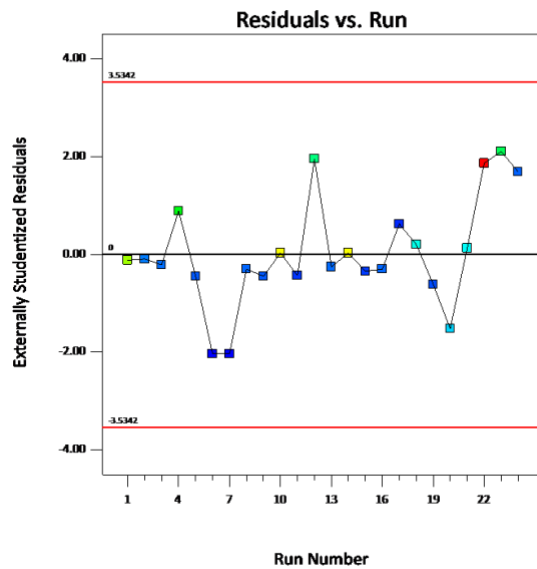

**Figure S14:** Residuals vs. run for the model developed from the I-optimal design used to optimize the use of Multifect 7L to clean cooked, shell on mussel.

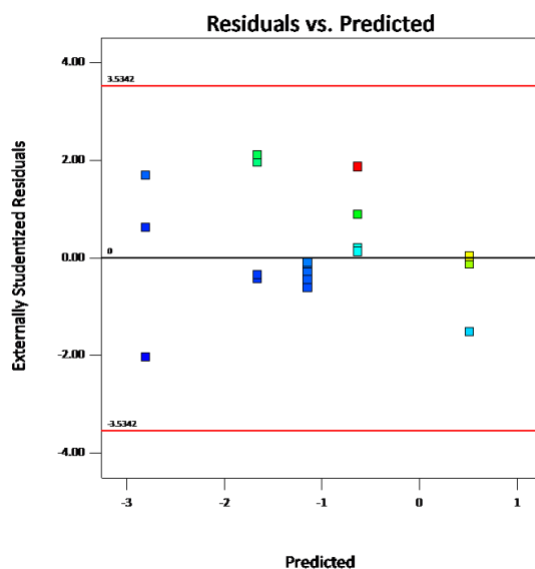

**Figure S15:** Residuals vs. predicted for the model developed from the I-optimal design used to optimize the use of Multifect 7L to clean cooked, shell on mussel.

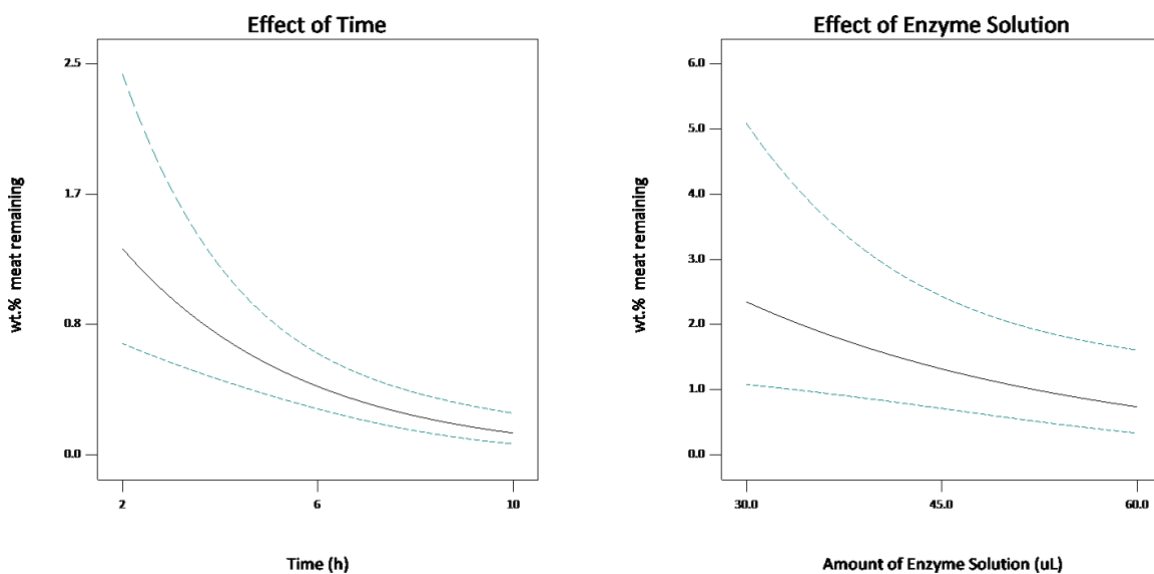

**Figure S16:** One factor plots for the I-optimal design for the optimization of reaction conditions with respect to time, amount of enzyme solution, and medium for the cleaning of cooked, shell on mussels using Multifect 7L. The effect of time (Z1), left, and the effect of the amount of enzyme solution (Z2), right.
